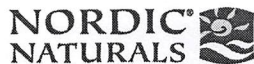

## Certificate of Analysis

|                               |                      |                                               |
|-------------------------------|----------------------|-----------------------------------------------|
| Product: Ultimate Omega 60ct. | Bulk Lot Nr.: 140851 | Bottle Lot Nr.: 141179                        |
| Manufacture Date: June, 2014  | Item Nr.: CAN-71790  | Shelf Life: Three years from manufacture date |

| Oxidation               | Test Method   | Limits          | Assay Result |
|-------------------------|---------------|-----------------|--------------|
| ACID                    | AOCS Cd 3d-63 | NMT 3.0 KOH/g   | 0.2 KOH/g    |
| PEROXIDE                | AOCS Cd 8b-90 | NMT 5.0 meq/kg  | 3.2 meq/kg   |
| ANISIDINE               | AOCS Cd 18-90 | NMT 20.0 meq/kg | 4 meq/kg     |
| TOTOX (TOTAL OXIDATION) | Calculation   | NMT 26.0 meq/kg | 10.4 meq/kg  |

| Heavy Metals | Test Method               | Limits              | Assay Result |
|--------------|---------------------------|---------------------|--------------|
| ARSENIC      | USEPA 305.1, 200.7, 200.8 | NMT 0.1 mg/kg (ppm) | < 0.05 ppm   |
| CADMIUM      | USEPA 305.1, 200.7, 200.8 | NMT 0.1 mg/kg (ppm) | < 0.01 ppm   |
| LEAD         | USEPA 305.1, 200.7, 200.8 | NMT 0.1 mg/kg (ppm) | < 0.02 ppm   |
| MERCURY      | USEPA 245.6               | NMT 0.1 mg/kg (ppm) | < 0.005 ppm  |

| Environmental Toxins                      | Test Method    | Limits                | Assay Result |
|-------------------------------------------|----------------|-----------------------|--------------|
| POLYCHLORINATED BIPHENYLS (PCBs)          | USEPA 1668 A/C | NMT 0.09 mcg/kg (ppm) | 0.003 ppm    |
| DIOXIN-LIKE PCBs (non-ortho & mono-ortho) | USEPA 1668 A/C | NMT 1.0 pcg/g (ppt)   | 0.01 ppt     |
| DIOXINS & FURANS (WHO TEQ)                | USEPA 1613B    | NMT 2.0 pcg/g (ppt)   | 0.2 ppt      |

| Microbial Analysis    | Test Method | Limits      | Assay Result |
|-----------------------|-------------|-------------|--------------|
| PLATE COUNT           | USP <2021>  | <1000 cfu/g | Negative     |
| STAPHYLOCOCCUS AUREUS | USP <2022>  | Absent      | Absent       |
| ESCHERICHIA COLI      | USP <2022>  | Absent      | Absent       |
| SALMONELLA            | USP <2022>  | Absent      | Absent       |
| YEAST & MOLD          | USP <2021>  | <100 cfu/g  | Negative     |

| Fatty Acid Profile                       | Test Method   | Label Claim (mg/capsule) | Assay Result |
|------------------------------------------|---------------|--------------------------|--------------|
| EICOSAPENTAENOIC ACID (EPA ; 20:5 (n-3)) | AOCS CE 1b-89 | 325 mg                   | 376.4 mg     |
| DOCOSAHEXAENOIC ACID (DHA ; 22:6 (n-3))  | AOCS CE 1b-89 | 225 mg                   | 257.3 mg     |
| TOTAL OMEGA-3                            | AOCS CE 1b-89 | 640 mg                   | 733.5 mg     |
| OTHER OMEGAS                             | AOCS CE 1b-89 | 90 mg                    | 99.8 mg      |

| Radioactivity              | Test Method          | Assay Result |
|----------------------------|----------------------|--------------|
| Radioactivity - Cesium 134 | JCRCl: Radioactivity | <3 Bq/Kg     |
| Radioactivity - Cesium 137 | JCRCl: Radioactivity | <3 Bq/Kg     |
| Radioactivity - Iodine 131 | JCRCl: Radioactivity | <3 Bq/Kg     |

|                                                                                                                         |                                                                                                                          |
|-------------------------------------------------------------------------------------------------------------------------|--------------------------------------------------------------------------------------------------------------------------|
| Prepared By<br><br>Quality Assurance | Reviewed By<br><br>Quality Assurance |
|-------------------------------------------------------------------------------------------------------------------------|--------------------------------------------------------------------------------------------------------------------------|
