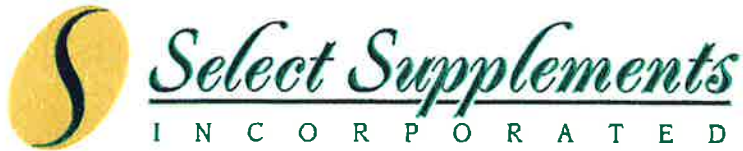

**Product Certificate of Analysis**

**Report Date: 08.31.15**  
**Report Number: 150243**

**Product Identity:**

|                                                                                        |                              |
|----------------------------------------------------------------------------------------|------------------------------|
| <b>Material Number:</b> NA                                                             |                              |
| <b>Material Name:</b> MEG-3 / (FORCE-study) softgel NN                                 | <b>Best-by date:</b> 07.2018 |
| <b>Batch Number:</b> 153143                                                            |                              |
| <b>Production date:</b> 07.2015                                                        | <b>Cust. PO # :</b>          |
| <b>Description:</b> Yellow liquid in a clear softgel, with lemon aroma, size 20 oblong |                              |

| Quality Attribute         | Specification           | Method       | Results       |
|---------------------------|-------------------------|--------------|---------------|
| Fill color                | Yellow                  | Visual       | Conforms      |
| Shell color               | Clear, with lemon aroma | Visual       | Conforms      |
| Size                      | 20 oblong               | Visual       | Conforms      |
| Average shell weight      | Target 340 - 440 mg/cap | TM-1030/1032 | 407.4 mg/cap  |
| Average fill weight       | n.l.t. 1032.5 mg/cap    | TM-1030/1032 | 1044.0 mg/cap |
| Weight variation          | Meets USP requirements  | TM-1030      | Conforms      |
| Disintegration            | n.m.t. 30 minutes       | TM-3410      | Conforms      |
| Peroxide value            | Report Only             | TM-6030      | 1.7 meq/kg    |
| Total aerobic plate count | < 1,000 cfu/g           | TM-7141      | 10 cfu/g      |
| Yeast & Mold              | < 100 cfu/g             | TM-7144      | <10 cfu/g     |
| Total Coliforms           | Negative                | TM-7140      | Negative      |
| Salmonella                | Negative                | TM-7143      | Negative      |
| E. coli                   | Negative                | TM-7140      | Negative      |
| Staphylococcus aureus     | Negative                | TM-7142      | Negative      |
| Active ingredient         |                         |              |               |
| <b>MEG-3 Oil</b>          |                         |              |               |
| EPA                       | n.l.t. 300 mg/cap       | TM-9010      | 304.5 mg/cap  |
| DHA                       | n.l.t. 200 mg/cap       | TM-9010      | 206.8 mg/cap  |
| Total Omega-3             | n.l.t. 540 mg/cap       | TM-9010      | 594.5 mg/cap  |
| Other Omega-3             | n.l.t. 40 mg/cap        | TM-9010      | 83.2 mg/cap   |

Other Ingredients: Gelatin, Glycerin, Lemon flavor, Water, Rosemary extract, Vitamin E.

Select Supplements, Inc.

*hanheng*

08.31.15

(Quality Assurance)

(Date)

### Bottled Product Certificate of Analysis

|                                 |                                |                                              |
|---------------------------------|--------------------------------|----------------------------------------------|
| Item: NA                        | Product: MEG-3, 150 ct. bottle | Page: Page 1 of 1                            |
| Version / index: 09.10.15 / 01  | Supersedes: **.**.**.**        | UPC Bar Code #: NA                           |
| Nordic Sku #: NA                |                                | Lot Number: 153521<br>Expiration date: 07.18 |
| Bulk softgel lot # used: 153143 | Label Rev.: NA                 | PO #: NA                                     |

**Quality Data:**

| Item                | Specification                                                               | Method              | Result    |
|---------------------|-----------------------------------------------------------------------------|---------------------|-----------|
| Bottle              | 300 cc HDPE white, Item # 15012                                             | Batch record        | Conforms  |
| Capsule             | ProOmega softgel, Item # 31262-NNM                                          | Batch record        | Conforms  |
| Bottle count        | 150 capsules                                                                | Physical Count      | Conforms  |
| Cap                 | 45-400 Lift-n-Peel, ribbed, white, w/ foil induction seal, Item # 15048     | Visual/Batch record | Conforms  |
| Neck Band           | 77 mm LFW, seamless, clear, no print, w/ vertical perforation, Item # 54079 | Batch record        | Conforms  |
| 12-pack shipper     | For bottle Item # 15012, Item # 54084                                       | Batch record        | Conforms  |
| Divider             | For 12-pack shipper for bottle Item # 15012, Item #54085                    | Batch record        | Conforms  |
| Total Aerobic Count | n.m.t. 1000 cfu/g                                                           | TM-7141             | 5 cfu/g   |
| Yeast & Mold        | n.m.t. 100 cfu/g                                                            | TM-7144             | <10 cfu/g |
| Salmonella          | Negative                                                                    | TM-7143             | Negative  |
| E. Coli             | Negative                                                                    | TM-7140             | Negative  |
| Staph. aureus       | Negative                                                                    | TM-7142             | Negative  |
| Total coliforms     | Negative                                                                    | TM-7140             | Negative  |

Disposition:

Approved

Rejected

By: *hauberg*  
(Quality Assurance)

Date: 09.10.15
